# Supplementary material for: Structural insights for the design of new borate–phosphates: synthesis, crystal structure and optical properties of Pb4O(BO3)(PO4) and Bi4O3(BO3)(PO4)
Source: Royal Society of Chemistry journal article supplement (doi:10.1039/c4dt01199f), 2014-01-01
Supplement: c4dt01199f1.pdf [file c4dt01199f1.pdf]

## Electronic Supplementary Information (ESI)

### **Structural Insights for the Design of New Borate-phosphates: Synthesis, Crystal Structure and Optical Properties of $\text{Pb}_4\text{O}(\text{BO}_3)(\text{PO}_4)$ and $\text{Bi}_4\text{O}_3(\text{BO}_3)(\text{PO}_4)$**

Ying Wang,<sup>a,b</sup> Shilie Pan,<sup>\*a</sup> Shengshi Huang,<sup>a,b</sup> Lingyun Dong,<sup>a,b</sup> Min Zhang<sup>a</sup>  
Shujuan Han<sup>a</sup> and Xian Wang<sup>a</sup>

<sup>a</sup> *Key Laboratory of Functional Materials and Devices for Special Environments of  
CAS, Xinjiang Technical Institute of physics & Chemistry of CAS, Xinjiang Key  
Laboratory of Electronic Information Materials and Devices, 40-1 South Beijing  
Road, Urumqi 830011, China*

<sup>b</sup> *University of Chinese Academy of Sciences, Beijing 100049, China*

*\* To whom correspondence should be addressed*

*E-mail: slpan@ms.xjb.ac.cn (Shilie Pan) Tel: (86)-991-3674558 Fax: (86)-991-  
3838957*

**Table S1.** Atomic Coordinates and Equivalent Isotropic Displacement Parameters ( $\text{\AA}^2$ ) for  $\text{Pb}_4\text{O}(\text{BO}_3)(\text{PO}_4)$  and  $\text{Bi}_4\text{O}_3(\text{BO}_3)(\text{PO}_4)$ .

| Atom                                              | Wyck. | $x/a$       | $y/b$                                                                     | $z/c$       | $U_{\text{eq}}^a$ |
|---------------------------------------------------|-------|-------------|---------------------------------------------------------------------------|-------------|-------------------|
| $\text{Pb}_4\text{O}(\text{BO}_3)(\text{PO}_4)$   |       |             |                                                                           |             |                   |
| Pb(1)                                             | 4e    | 0.86999(9)  | 0.22743(11)                                                               | 0.06858(7)  | 0.013(1)          |
| Pb(2)                                             | 4e    | 0.45093(9)  | 0.19882(11)                                                               | 0.07416(7)  | 0.016(1)          |
| Pb(3)                                             | 4e    | 0.75925(10) | -                                                                         | 0.29334(7)  | 0.016(1)          |
| Pb(4)                                             | 4e    | 0.76925(9)  | $\hat{0}\hat{.}\hat{4}\hat{9}\hat{1}\hat{6}\hat{1}\hat{(}\hat{1}\hat{0})$ | 0.26588(7)  | 0.014(1)          |
| B(1)                                              | 4e    | 0.458(3)    | 0.730(3)                                                                  | 0.1345(18)  | 0.008(5)          |
| P(1)                                              | 4e    | 0.8992(7)   | -0.2502(7)                                                                | 0.1018(5)   | 0.014(1)          |
| O(1)                                              | 4e    | 0.7088(16)  | 0.2177(17)                                                                | 0.1629(11)  | 0.012(3)          |
| O(2)                                              | 4e    | 0.9342(18)  | -0.140(2)                                                                 | 0.2120(12)  | 0.027(4)          |
| O(3)                                              | 4e    | 1.0349(17)  | -0.326(2)                                                                 | 0.0953(12)  | 0.023(3)          |
| O(4)                                              | 4e    | 0.8278(16)  | -0.1157(18)                                                               | 0.0032(12)  | 0.020(3)          |
| O(5)                                              | 4e    | 0.6854(17)  | 0.2497(16)                                                                | -0.1129(12) | 0.014(3)          |
| O(6)                                              | 4e    | 0.7937(15)  | 0.5859(18)                                                                | 0.0881(11)  | 0.016(3)          |
| O(7)                                              | 4e    | 0.5291(18)  | 0.589(2)                                                                  | 0.2056(16)  | 0.036(4)          |
| O(8)                                              | 4e    | 0.4729(17)  | 0.133(2)                                                                  | -0.0971(11) | 0.023(4)          |
| $\text{Bi}_4\text{O}_3(\text{BO}_3)(\text{PO}_4)$ |       |             |                                                                           |             |                   |
| Bi(1)                                             | 8c    | 0.05342(10) | 0.71229(4)                                                                | 0.30675(2)  | 0.013(1)          |
| Bi(2)                                             | 8c    | 0.54041(11) | 0.52313(4)                                                                | 0.30828(3)  | 0.017(1)          |
| Bi(3)                                             | 8c    | 0.03571(10) | 0.54061(4)                                                                | 0.42524(2)  | 0.012(1)          |
| Bi(4)                                             | 8c    | 0.56453(10) | 0.73778(4)                                                                | 0.41555(3)  | 0.016(1)          |
| B(1)                                              | 8c    | 0.537(3)    | 0.3862(12)                                                                | 0.1878(8)   | 0.015(4)          |
| P(1)                                              | 8c    | 0.0091(7)   | 0.8760(3)                                                                 | 0.45401(18) | 0.013(1)          |
| O(1)                                              | 8c    | 0.2619(18)  | 0.6271(6)                                                                 | 0.3697(4)   | 0.013(2)          |
| O(2)                                              | 8c    | 0.2979(18)  | 0.6189(6)                                                                 | 0.2494(4)   | 0.011(2)          |
| O(3)                                              | 8c    | 0.7719(18)  | 0.6332(6)                                                                 | 0.3697(4)   | 0.014(2)          |
| O(4)                                              | 8c    | -0.0383(18) | 0.7913(7)                                                                 | 0.4121(5)   | 0.018(2)          |
| O(5)                                              | 8c    | 0.207(2)    | 0.8511(7)                                                                 | 0.4980(5)   | 0.022(3)          |
| O(6)                                              | 8c    | 0.093(2)    | 0.9607(8)                                                                 | 0.4163(5)   | 0.026(3)          |
| O(7)                                              | 8c    | -0.232(2)   | 0.8930(8)                                                                 | 0.4853(5)   | 0.030(3)          |
| O(8)                                              | 8c    | 0.698(2)    | 0.4201(8)                                                                 | 0.2286(6)   | 0.031(3)          |
| O(9)                                              | 8c    | -0.074(2)   | 0.4414(9)                                                                 | 0.3534(5)   | 0.030(3)          |
| O(10)                                             | 8c    | 0.480(2)    | 0.7866(9)                                                                 | 0.3195(6)   | 0.029(3)          |

<sup>a</sup> $U_{\text{eq}}$  is defined as one-third of the trace of the orthogonalized  $U_{ij}$  tensor.

**Table S2.** Selected Bond Distances (Å) for the two compounds.

| Pb <sub>4</sub> O(BO <sub>3</sub> )(PO <sub>4</sub> )               |           |             |           |
|---------------------------------------------------------------------|-----------|-------------|-----------|
| Pb(1)-O(5)                                                          | 2.368(15) | Pb(4)-O(1)  | 2.278(12) |
| Pb(1)-O(1)                                                          | 2.401(13) | Pb(4)-O(7)  | 2.362(16) |
| Pb(1)-O(4)                                                          | 2.528(13) | Pb(4)-O(6)  | 2.495(13) |
| Pb(1)-O(6)                                                          | 2.670(13) | Pb(4)-O(5)  | 2.663(13) |
| Pb(1)-O(3)                                                          | 2.741(14) | Pb(4)-O(2)  | 3.300(16) |
| Pb(1)-O(2)                                                          | 3.088(14) | Pb(4)-O(2)  | 3.067(18) |
| Pb(1)-O(2)                                                          | 2.908(13) | Pb(4)-O(3)  | 3.058(13) |
|                                                                     |           | Pb(4)-O(4)  | 3.013(15) |
| Pb(2)-O(8)                                                          | 2.354(13) |             |           |
| Pb(2)-O(1)                                                          | 2.427(15) | B(1)-O(7)   | 1.350(3)  |
| Pb(2)-O(8)                                                          | 2.434(15) | B(1)-O(5)   | 1.380(3)  |
| Pb(2)-O(4)                                                          | 2.683(15) | B(1)-O(8)   | 1.390(3)  |
| Pb(2)-O(6)                                                          | 2.966(12) |             |           |
| Pb(2)-O(7)                                                          | 3.151(11) | P(1)-O(3)   | 1.515(16) |
| Pb(2)-O(7)                                                          | 2.877(21) | P(1)-O(4)   | 1.521(15) |
|                                                                     |           | P(1)-O(2)   | 1.535(14) |
| Pb(3)-O(1)                                                          | 2.225(12) | P(1)-O(6)   | 1.536(14) |
| Pb(3)-O(3)                                                          | 2.400(16) |             |           |
| Pb(3)-O(5)                                                          | 2.460(13) |             |           |
| Pb(3)-O(2)                                                          | 2.568(14) |             |           |
| Pb(3)-O(7)                                                          | 3.026(19) |             |           |
| Pb(3)-O(8)                                                          | 2.844(12) |             |           |
| Bi <sub>4</sub> O <sub>3</sub> (BO <sub>3</sub> )(PO <sub>4</sub> ) |           |             |           |
| Bi(1)-O(1)                                                          | 2.191(10) | Bi(3)-O(5)  | 3.447(10) |
| Bi(1)-O(2)                                                          | 2.291(10) | Bi(3)-O(7)  | 3.001(11) |
| Bi(1)-O(2)                                                          | 2.312(10) |             |           |
| Bi(1)-O(3)                                                          | 2.387(10) | Bi(4)-O(3)  | 2.138(10) |
| Bi(1)-O(10)                                                         | 2.597(13) | Bi(4)-O(4)  | 2.326(11) |
| Bi(1)-O(4)                                                          | 2.680(11) | Bi(4)-O(10) | 2.327(13) |
| Bi(1)-O(8)                                                          | 3.335(11) | Bi(4)-O(5)  | 2.453(11) |
| Bi(1)-O(10)                                                         | 3.355(11) | Bi(4)-O(1)  | 2.515(10) |
| Bi(1)-O(10)                                                         | 3.069(13) | Bi(4)-O(4)  | 3.422(10) |
|                                                                     |           | Bi(4)-O(5)  | 3.154(10) |
| Bi(2)-O(2)                                                          | 2.325(10) | Bi(4)-O(7)  | 2.924(11) |
| Bi(2)-O(2)#3                                                        | 2.357(10) | Bi(4)-O(7)  | 3.336(11) |
| Bi(2)-O(3)                                                          | 2.445(10) | Bi(4)-O(9)  | 3.198(12) |
| Bi(2)-O(8)                                                          | 2.474(12) |             |           |
| Bi(2)-O(8)                                                          | 2.530(12) | B(1)-O(9)   | 1.360(2)  |
| Bi(2)-O(1)                                                          | 2.540(10) | B(1)-O(8)   | 1.370(2)  |
| Bi(2)-O(9)                                                          | 2.632(12) | B(1)-O(10)  | 1.420(2)  |
| Bi(2)-O(6)                                                          | 2.700(12) |             |           |
|                                                                     |           | P(1)-O(5)   | 1.519(11) |
| Bi(3)-O(1)                                                          | 2.153(10) | P(1)-O(7)   | 1.527(13) |
| Bi(3)-O(9)                                                          | 2.229(12) | P(1)-O(6)   | 1.539(12) |
| Bi(3)-O(3)                                                          | 2.328(10) | P(1)-O(4)   | 1.547(11) |

---

|            |           |
|------------|-----------|
| Bi(3)-O(6) | 2.353(11) |
| Bi(3)-O(7) | 2.575(13) |
| Bi(3)-O(5) | 2.942(11) |

---

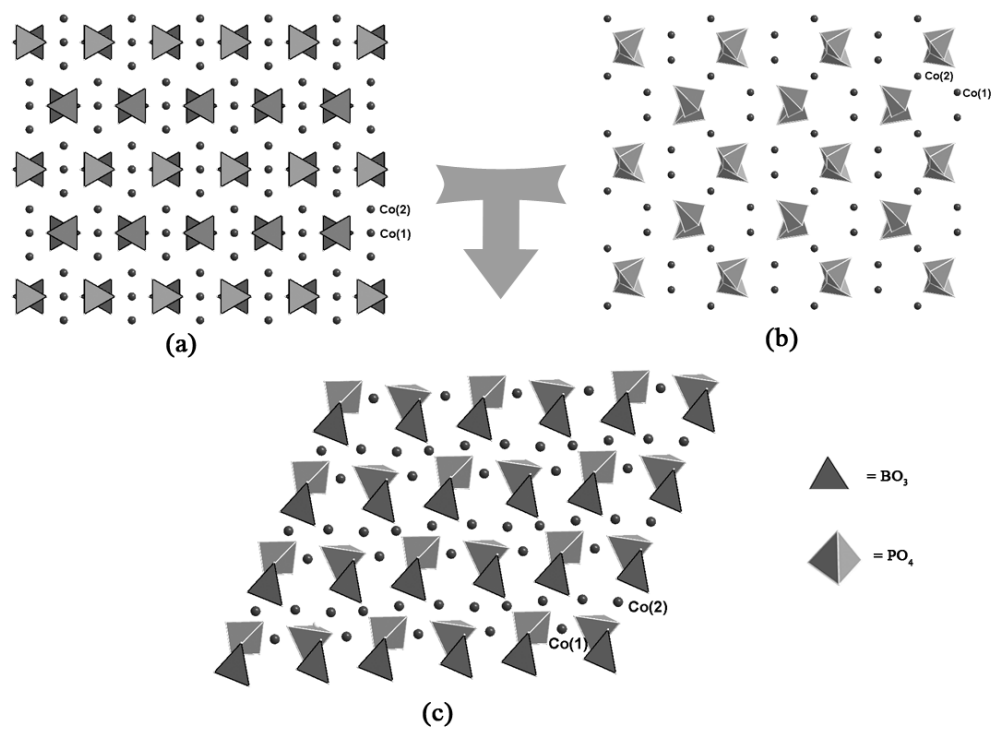

**Fig. S1** View of crystal structure of (a)  $\text{Co}_3(\text{BO}_3)_2$ , (b)  $\text{Co}_3(\text{PO}_4)_2$ , and (c)  $\text{Co}_3(\text{BO}_3)(\text{PO}_4)$ ;

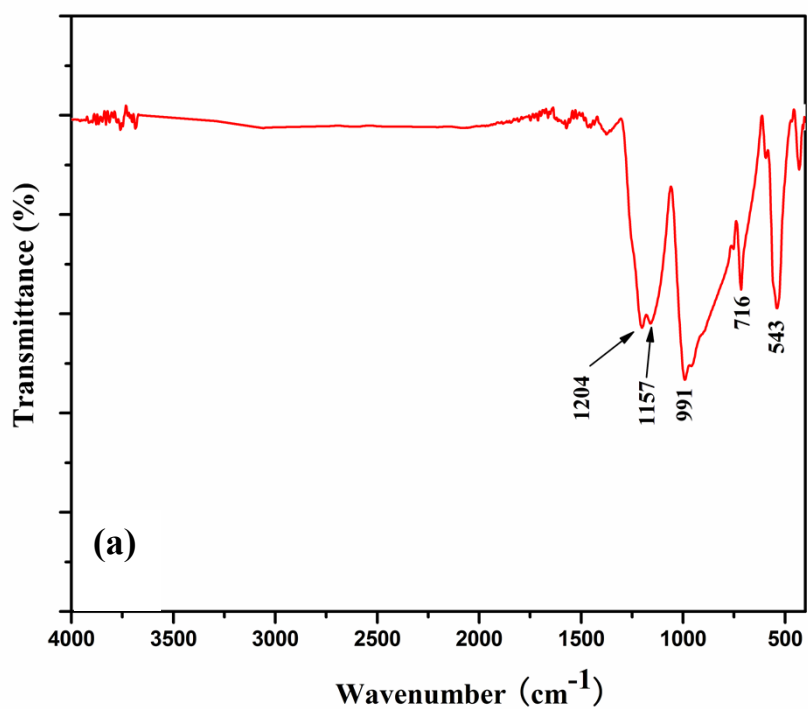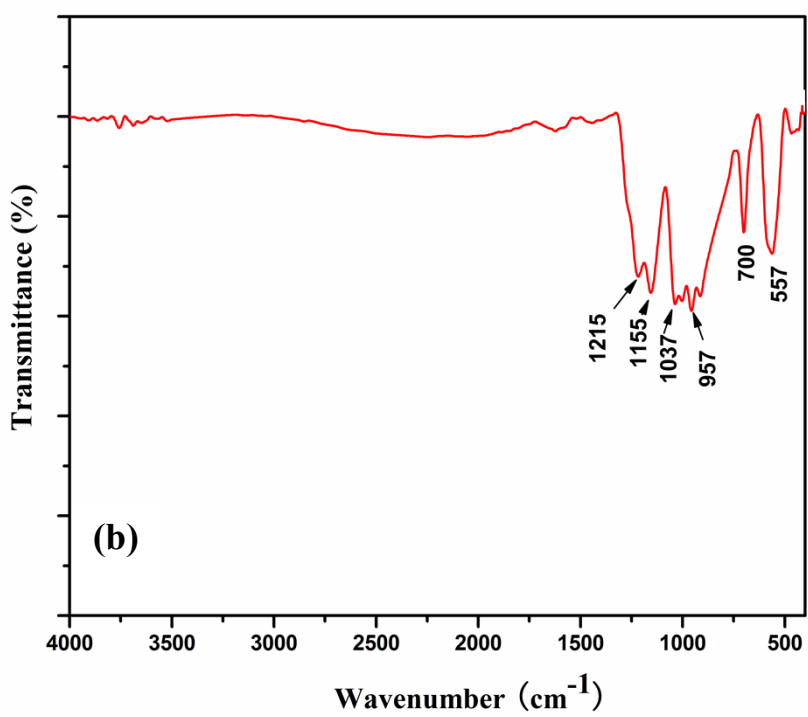

**Fig. S2** IR Spectroscopy for (a)  $\text{Pb}_4\text{O}(\text{BO}_3)(\text{PO}_4)$  and (b)  $\text{Bi}_4\text{O}_3(\text{BO}_3)(\text{PO}_4)$ .

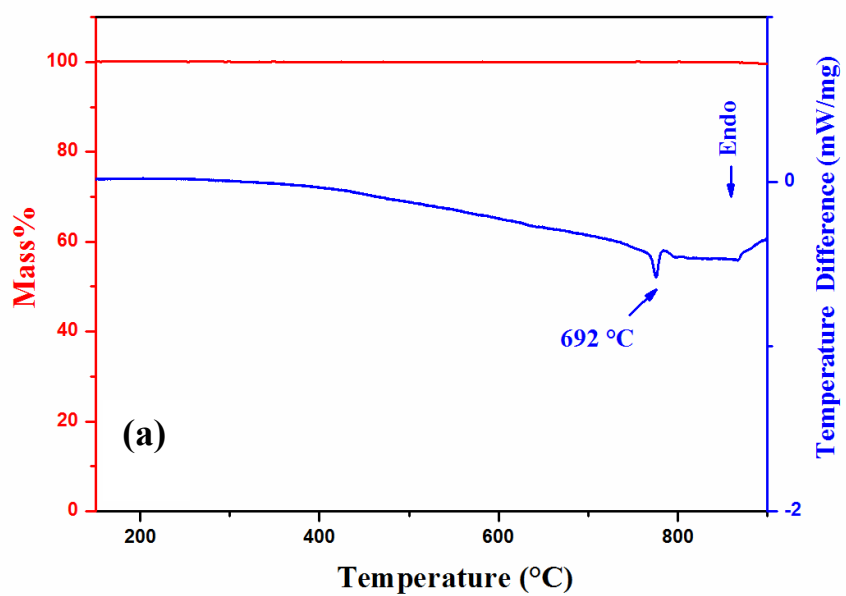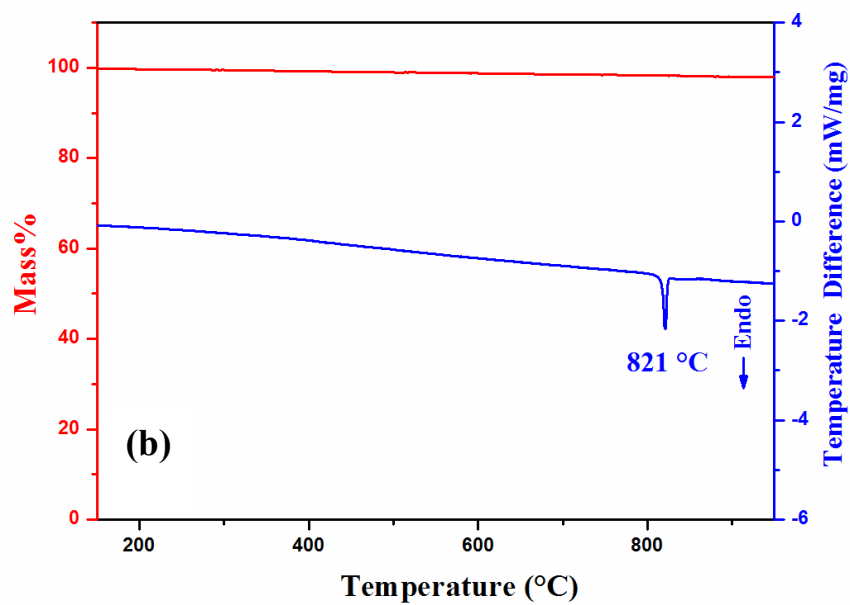

**Fig. S3** TGA/DSC curves of (a)  $\text{Pb}_4\text{O}(\text{BO}_3)(\text{PO}_4)$  and (b)  $\text{Bi}_4\text{O}_3(\text{BO}_3)(\text{PO}_4)$ .

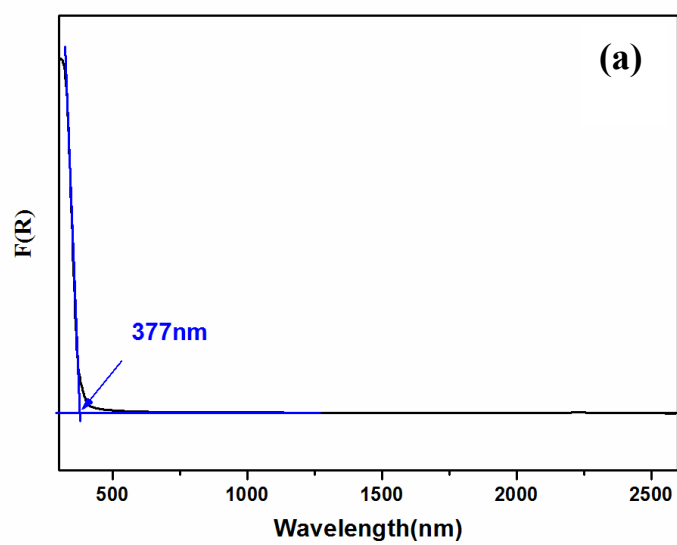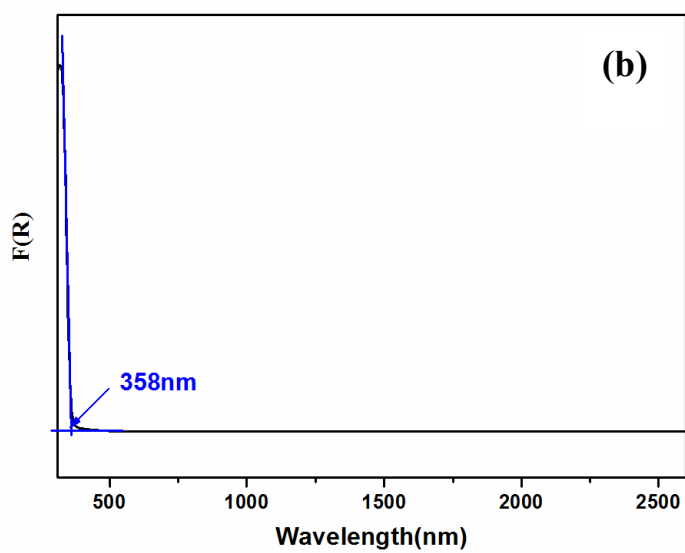

**Fig. S4** UV-vis-NIR diffuse reflectance spectroscopy of (a)  $\text{Pb}_4\text{O}(\text{BO}_3)(\text{PO}_4)$  and (b)  $\text{Bi}_4\text{O}_3(\text{BO}_3)(\text{PO}_4)$ .
